# Supplementary material for: Overexpression of SIRT3 disrupts mitochondrial proteostasis and cell cycle progression
Source: PubMed Central journal article supplement (PMC4818846; doi:10.1007/s13238-016-0251-z), 2016-02-18
Supplement: 13238_2016_251_MOESM1_ESM.pdf [file 13238_2016_251_MOESM1_ESM.pdf]

## **MATERIALS AND METHODS**

### ***Chemicals and Reagents***

Dulbecco's Modified Eagle Medium(DMEM), fetal bovine serum, and penicillin-streptomycin were purchased from Wisent (Saint-Jean-Baptiste, CA). The 293T cell line was obtained from the Tumor Cell Bank of the Chinese Academy of Medical Sciences (Beijing, China). Dithiothreitol (DTT) and BCA protein assay kit were purchased from Solarbio (Beijing, China). Sequencing grade modified trypsin was purchased from Promega (Fitchburg, WI). Mass spectrometry grade acetonitrile was purchased from Thermo (Waltham, MA). The TMT labeling kit was purchased from Thermo-Pierce Biotechnology (Rock-ford, IL). Cell counting kit-8 was purchased from Dojindo (Kumamoto, Japan). H<sub>2</sub>O<sub>2</sub> was purchased from Aladdin (Shanghai, China). The Total RNA Isolation System and Reverse Transcription kits were purchased from TIANGEN (Beijing, China). AceQ qPCR SYBR Green Master Mix was purchased from Vazyme (Nanjing, China). anti-SIRT3 monoclonal antibody were obtained from Cell Signaling Technology (Danvers, MA).

### ***Clinical human ccRCC specimens***

18 pairs of ccRCC and pericarcinous tissue samples were collected after written informed consent from patients with ccRCC undergoing surgery at the Department of Urological Surgery of the General Hospital of PLA during 2013–2014 (Beijing, China). The group was composed of 14 men and 4 women with a mean age of 50.3 years (range 29–66 years) at the time of operation. The study was approved by the Scientific and

Ethnic Committee of the General Hospital of PLA, Kidney cancer tissues were surgically removed from ccRCC patient while samples of pericarcinous tissues were obtained from the distal edge of the resection at least 6 cm from the tumor tissue. Part of the specimen was directly snap-frozen in liquid nitrogen, and stored at -80°C before extraction of total proteins. The other part of specimen was fixed in buffered formalin for 48 h, embedded in paraffin, and sectioned into 5 LM slides for immunohistochemistry (IHC) examination. Total proteins were extracted from paired tissues using 8M Urea in PBS (pH 7.4) followed by western blotting.

#### ***Cell Culture and Establishment of stable SIRT3 overexpression cell line***

The human embryonic kidney cell line 293T cells were maintained in DMEM media (Wisent, Montreal, QC) supplemented with 10% fetal bovine serum (Wisent, Montreal, QC) and 1% penicillin/streptomycin (Wisent, Montreal, QC) at 37°C in a humidified incubator with 5% CO<sub>2</sub>.

Lentiviral expression vector pLVX-IRES-ZsGreen1 with reporter gene of GFP and the packaging vectors were gifts from Dr. Jun Xu (Tongji University, Shanghai, China). The human SIRT3 cDNA was synthesized from the total RNA of 293T cell line. A FLAG-tag sequence was added onto the C-terminal of SIRT3 DNA. The recombinant human SIRT3 DNA was cloned into pLVX-IRES-ZsGreen1 to create the pLVX-SIRT3-IRES-ZsGreen1 vector. Then, we co-transfected pLVX-SIRT3-IRES-ZsGreen1 or pLVX-IRES-ZsGreen1, respectively, with packing vectors into 293T cells when they reached 80-90% confluence. The cell culture supernatant was then collected

after 48 h and was concentrated with PEG6000. The precipitated lentiviral particles were resuspended in PBS.

293T cells were cultured in a 12-well plate and lentiviral particles with  $5 \mu\text{g ml}^{-1}$  polybrene were added into 293T cells when they reached 30–40% confluence. After 72 h, a large population of cells expressed GFP and emitted green fluorescence. Cells were sorted by a flow cytometer to generate the monoclonal stable cell line. The clone with intense and uniform GFP expression was selected and used in the present study. The expression of SIRT3 was examined by western blotting and qPCR.

#### ***Cell proliferation assay with CCK-8***

Cells were seeded in 96-well plates with 2500 cells/well. CCK-8 reagents were added into wells after cells grew for 0, 12, 24, 36, 48, 72, 84, 96 h respectively. The CCK8 reagent was added to medium according to the manufacturer's instructions (Dojindo Laboratories, Kumamoto, Japan) and incubated at 37 °C for 2 h. Optical density (OD) was measured at 450 nm with a microplate reader (Bio-Rad, Hercules).

#### ***Survival rate of SIRT3 overexpression cells treated with hydrogen peroxide***

Effects of hydrogen peroxide on control and SIRT3 overexpression cells were analyzed with the CCK-8 kit. Briefly, Cells were treated with hydrogen peroxide (200 and 400 $\mu\text{M}$ ) in triplicates for 12 hours. The CCK-8 reagent was added to treated cells and incubated at 37 °C for 2 h. Absorbance at 450 nm was measured 2 h after CCK-8 addition.

### ***Detection of cellular reactive oxygen species (ROS)***

The ROS in SIRT3 overexpression cells was detected using CellROX<sup>®</sup> Deep Red Reagents (Invitrogen, Grand Island, NY) according to the manufacturer's instructions. Briefly, adding the probe to the complete medium with 5  $\mu$ M CellROX<sup>®</sup> Deep Red Reagent and incubating the cells at 37 °C for 30 minutes. The cells were then washed with HBSS and analyzed on a BD FACSAriaII Flow Cytometer (BD Biosciences, San Jose, CA).

### ***Cell Cycle Analysis***

The Cells were seeded in 6-well plates with about  $1 \times 10^6$  cells/well and allowed to grow for 24 hours. Then, cells were harvested, washed with cold PBS, and fixed overnight in pre-cooled 70% ethanol at 4 °C. After that, cells were washed with cold PBS and re-suspended in a PBS solution containing 25 mg/ml RNase A at 37 °C for 30 minutes. Then cells were incubated with 10mg/ml propidium iodide (PI) solution in dark at 4 °C for 1 hour before being transferred to FACS tubes for flow cytometry analysis. DNA content was analyzed using BD FACSCalibur (Becton Dickinson, Franklin Lakes, NJ) and data were acquired and analyzed using the CELLQuest software from Becton Dickinson.

### ***Sample Preparation and Quantitative Proteomic Analysis***

Proteomic analysis was carried out in biological duplicates. Cells were washed twice with PBS, and lysed with 8 M Urea in PBS. Protein concentrations were measured by the BCA method. Equal amount of proteins from 293T control and 293T SIRT3

overexpression cells (100  $\mu$ g) were reduced with 5 mM dithiothreitol (DTT) and alkylated with 12.5 mM iodoacetamide (IAA). Samples were diluted with PBS to 1.5 M Urea followed by digestion with trypsin of a 1:100 protease/protein ratio at 37  $^{\circ}$ C overnight. Samples were desalted using Sep-Pak C18 cartridges. Purified peptides were labeled with TMT reagents (Thermo, Pierce Biotechnology, Rockford, IL) according to the manufacture's instruction. Briefly, the TMT labeling reagents was dissolved in anhydrous acetonitrile and added to each digested products, then the reaction was incubated at room temperature for 1 hour, and quenched by 5% hydroxylamine for 15 min. The TMT labeled peptides were mixed and desalted by desalted by Sep-Pak C18 cartridges. The peptides were fractionated by a UPLC3000 system (Dionex, CA) with a XBridge TMBEH300 C18 column (Waters, MA). Mobile phase A is H<sub>2</sub>O with ammonium hydroxide, pH 10; and mobile phase B is acetonitrile in ammonium hydroxide pH 10. Peptides were separated with the following gradients: 8% to 18% phase B, 30 min; 18% to 32% phase B, 22 min; 48 fractions were collected, dried by a speedvac, combined into 12 fractions, and redissolved in 0.1% formic acid for the following nano-LC-MS/MS analysis.

For quantitative proteomics analysis, the peptides were separated by a C<sub>18</sub> column (75  $\mu$ m inner-diameter, 150 mm length; Upchurch, Oak Harbor, USA) at a flow rate of 250 nL/min. Mobile phase A consisted of 0.1% formic acid, and mobile phase B consisted of 100% acetonitrile and 0.1% formic acid. The Q-Exactive mass spectrometer was operated in the data-dependent acquisition mode using Xcalibur 3.0 software: there was a single full-scan mass spectrum in the orbitrap (300 –1800 m/z,

70,000 resolution) followed by 20 data-dependent MS/MS scans at 35% normalized collision energy.

The generated MS/MS spectra were searched against the Uniprot Human database (January 10, 2015; 89105 sequences) using the SEQUEST searching engine of Proteome Discoverer software (version 1.4). The search criteria were as follows: full tryptic specificity was required; one missed cleavage was allowed; carbamidomethylation (C) and TMT sixplex (K and N-terminal) were set as the fixed modifications; the oxidation (M) was set as the variable modification; precursor ion mass tolerances were set at 10 ppm for all MS acquired in an Orbitrap mass analyzer; and the fragment ion mass tolerance was set at 20 mmu for all MS2 spectra acquired. The peptide false discovery rate was calculated using Percolator provided by PD. When the q value was smaller than 1%, the peptide spectrum match was considered to be correct. False discovery was determined based on peptide spectrum match when searched against the reverse, decoy database. Peptides only assigned to a given protein group were considered as unique. The false discovery rate was also set to 0.01 for protein identifications. Relative protein quantification was performed using Proteome Discoverer software (Version 1.4) according to manufacturer's instructions on the six reporter ion intensities per peptide. Protein ratios were calculated as the median of all peptide hits belonging to a protein. Quantitative precision was expressed as protein ratio variability. Differentially expressed proteins were further confirmed by qPCR or western blotting.

### ***Pull down assay***

Cells were lysed in ice-cold 1% NP-40 lysis buffer. The lysates were incubated with anti-FLAG beads for 8h. The precipitated protein complexes were washed three times with lysis buffer without NP-40 and then suspended in protein loading buffer (contained Dithiothreitol). The samples were subjected to SDS-PAGE separation followed by LC-MS/MS analysis.

### ***Western blotting***

Cells were harvested and lysed on ice with RIPA lysis buffer. The supernatants were collected after centrifugation at 14,000 ×g for 10 min at 4°C. Protein concentrations were measured with the BCA protein assay kit. Proteins were separated in 12% SDS-PAGE gel and transferred onto a PVDF transfer membrane with electroblotting. After blocking with 5% nonfat milk for 1 h at room temperature, the membrane was incubated overnight at 4°C with primary antibody, washed with TBST buffer for 3 times, then incubated with anti-mouse or anti-rabbit secondary antibody labeled with HRP at room temperature for 1 h. The membrane was further washed with TBST buffer 3 times and developed with ECL reagents (Engreen, China). β-actin was detected with anti-β-actin antibody as an internal control. BioRad Image Lab software was used to analyze the images.

### ***Real-time Quantitative PCR (qPCR)***

The control cells and SIRT3 overexpression cells were cultured in DMEM medium. Total RNA was extracted using RNAPrep pure Cell / Bacteria Kit. cDNA was

synthesized from 3  $\mu\text{g}$  total RNA with the Reverse transcription kit. Quantitative real-time PCR was performed the Roche LightCycler® 480II Detection System with SYBR green incorporation according to the manufacturer's instructions and  $\beta$ -actin was detected as an internal control. The primers were either designed by using the Primer Premier 5 software or from Primer Bank (<http://pga.mgh.harvard.edu/primerbank/>). The specific PCR products were confirmed by melting curve analysis. Relative expression was analyzed using the  $2^{-\Delta\Delta C_t}$  method. Primer sequences for qPCR are listed in supplemental Table S3.

### ***Statistical Method***

Statistical analysis was carried out with GraphPad Prism 5.0 software. Significant differences in the data were determined by Student's t-test. *P* values of  $<0.05$  were considered significant.

### **Supplementary figures:**

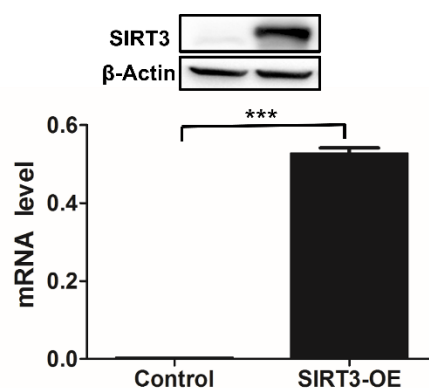

Supplementary Figure 1. qPCR and Western blotting images of SIRT3 in the control and SIRT3-OE cells.



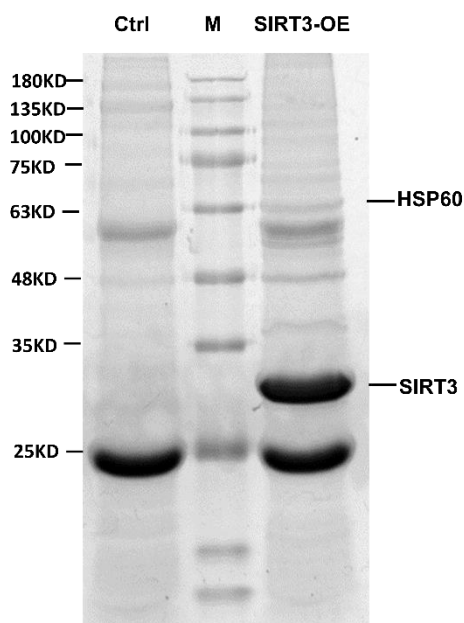

Supplementary Figure 2. 1D SDS-PAGE Separation of SIRT3-binding proteins by immunoprecipitation (IP) with an anti-FLAG antibody.

S1 Table. The list of 95 up-regulated proteins in 293T SIRT3-OE cells compared to control cells.

| Accession | Description                                                           | Score  | Coverage | Unique Peptides | Ratio (OE/ctrl) | MW [kDa] |
|-----------|-----------------------------------------------------------------------|--------|----------|-----------------|-----------------|----------|
| P21333-2  | Isoform 2 of Filamin-A                                                | 1837.8 | 58.7     | 119             | 1.51            | 279.8    |
| P08670    | Vimentin                                                              | 1772.9 | 85.0     | 59              | 1.58            | 53.6     |
| Q4VCS5    | Angiomotin                                                            | 1237.9 | 59.2     | 58              | 1.71            | 118.0    |
| Q8WUM4    | Programmed cell death 6-interacting protein                           | 777.1  | 70.2     | 1               | 1.78            | 96.0     |
| P13667    | Protein disulfide-isomerase A4                                        | 742.7  | 67.0     | 59              | 1.53            | 72.9     |
| P09936    | Ubiquitin carboxyl-terminal hydrolase isozyme L1                      | 678.9  | 90.1     | 19              | 2.05            | 24.8     |
| Q8NC51-2  | Isoform 2 of Plasminogen activator inhibitor 1 RNA-binding protein    | 475.7  | 52.7     | 1               | 3.08            | 44.2     |
| P07197    | Neurofilament medium polypeptide                                      | 387.0  | 54.4     | 44              | 1.83            | 102.4    |
| P15121    | Aldose reductase                                                      | 375.7  | 72.8     | 18              | 1.52            | 35.8     |
| Q9NTG7    | NAD-dependent protein deacetylase sirtuin-3, mitochondrial            | 324.2  | 49.4     | 13              | 6.27            | 43.5     |
| P10412    | Histone H1.4                                                          | 320.9  | 37.0     | 2               | 1.63            | 21.9     |
| P58107    | Epiplakin                                                             | 283.2  | 39.5     | 41              | 1.82            | 555.3    |
| O43852    | Calumenin                                                             | 258.8  | 51.1     | 4               | 1.72            | 37.1     |
| Q01581    | Hydroxymethylglutaryl-CoA synthase]                                   | 252.2  | 55.2     | 22              | 2.01            | 57.3     |
| Q15942    | Zyxin                                                                 | 251.3  | 48.6     | 20              | 1.60            | 61.2     |
| Q9P0L0-2  | Isoform 2 of Vesicle-associated membrane protein-associated protein A | 244.5  | 38.1     | 1               | 1.65            | 32.6     |

|          |                                                                 |       |      |    |      |       |
|----------|-----------------------------------------------------------------|-------|------|----|------|-------|
| Q9UNF1   | Melanoma-associated antigen D2                                  | 218.3 | 45.4 | 30 | 1.54 | 64.9  |
| Q6NSI4   | Uncharacterized protein CXorf57                                 | 200.8 | 37.2 | 27 | 1.72 | 97.5  |
| P07196   | Neurofilament light polypeptide                                 | 184.6 | 34.8 | 19 | 2.09 | 61.5  |
| P04792   | Heat shock protein beta-1                                       | 162.7 | 86.8 | 14 | 1.98 | 22.8  |
| J3KMY5   | Epididymal secretory protein E1                                 | 144.7 | 52.7 | 10 | 1.51 | 16.2  |
| Q16527   | Cysteine and glycine-rich protein 2                             | 123.1 | 63.2 | 12 | 1.51 | 20.9  |
| Q15154-2 | Isoform 2 of Pericentriolar material 1 protein                  | 112.4 | 16.3 | 22 | 1.58 | 222.1 |
| Q8N3C0   | Activating signal cointegrator 1 complex subunit 3              | 109.9 | 14.4 | 23 | 1.50 | 251.3 |
| Q9P0V9-3 | Isoform 3 of Septin-10                                          | 98.4  | 24.4 | 6  | 1.64 | 50.0  |
| O00762   | Ubiquitin-conjugating enzyme E2 C                               | 97.8  | 58.1 | 11 | 1.53 | 19.6  |
| Q9H3G5   | Probable serine carboxypeptidase CPVL                           | 96.3  | 26.3 | 12 | 1.71 | 54.1  |
| P10321   | HLA class I histocompatibility antigen, Cw-7 alpha chain        | 95.8  | 31.4 | 1  | 1.65 | 40.6  |
| Q16352   | Alpha-internexin                                                | 95.2  | 14.0 | 2  | 2.07 | 55.4  |
| Q8IVD9   | NudC domain-containing protein 3                                | 94.1  | 42.1 | 17 | 1.52 | 40.8  |
| Q02818   | Nucleobindin-1                                                  | 91.8  | 50.5 | 19 | 1.60 | 53.8  |
| E9PC15   | Acylglycerol kinase                                             | 86.2  | 36.0 | 13 | 1.51 | 43.8  |
| Q00534   | Cyclin-dependent kinase 6                                       | 85.1  | 41.7 | 10 | 1.66 | 36.9  |
| H0YKN4   | Annexin A2                                                      | 74.3  | 63.8 | 1  | 1.55 | 7.6   |
| Q96H79   | Zinc finger CCCH-type antiviral protein 1-like                  | 73.9  | 57.7 | 12 | 2.33 | 32.9  |
| Q9Y6H1   | Coiled-coil-helix-coiled-coil-helix domain-containing protein 2 | 65.4  | 15.2 | 3  | 2.69 | 15.5  |
| Q9Y6I9   | Testis-expressed sequence 264 protein                           | 63.3  | 27.2 | 8  | 1.65 | 34.2  |
| P78559   | Microtubule-associated protein 1A                               | 60.9  | 7.5  | 14 | 1.51 | 305.3 |
| P84101-4 | Isoform 4 of Small EDRK-rich factor 2                           | 54.0  | 42.2 | 4  | 2.28 | 5.2   |
| Q9NS86   | LanC-like protein 2                                             | 51.7  | 13.8 | 5  | 1.53 | 50.8  |
| Q99442   | Translocation protein SEC62                                     | 50.9  | 11.8 | 6  | 1.72 | 45.8  |
| Q9P2B2   | Prostaglandin F2 receptor negative regulator                    | 49.6  | 16.7 | 11 | 1.59 | 98.5  |
| Q6P1Q9   | Methyltransferase-like protein 2B                               | 44.4  | 37.0 | 2  | 1.59 | 43.4  |
| P45877   | Peptidyl-prolyl cis-trans isomerase C                           | 43.4  | 17.5 | 3  | 1.51 | 22.7  |
| A8MWK3   | Cadherin-2                                                      | 41.2  | 11.7 | 6  | 1.59 | 97.0  |
| Q9BT09   | Protein canopy homolog 3                                        | 39.0  | 35.6 | 8  | 1.65 | 30.7  |
| Q8N556   | Actin filament-associated protein 1                             | 36.6  | 5.2  | 4  | 2.51 | 80.7  |
| E7ET33   | Inter-alpha-trypsin inhibitor heavy chain H3                    | 36.5  | 4.4  | 3  | 2.66 | 78.1  |
| H0YKX3   | PCNA-associated factor                                          | 36.2  | 58.3 | 4  | 1.75 | 9.3   |
| P09543-2 | Isoform CNPI of 2',3'-cyclic-nucleotide 3'-phosphodiesterase    | 35.8  | 23.2 | 8  | 1.66 | 45.1  |
| P47974   | Zinc finger protein 36, C3H1 type-like 2                        | 33.6  | 17.8 | 7  | 1.61 | 51.0  |
| Q8N0U8   | Vitamin K epoxide reductase complex subunit 1-like protein 1    | 31.6  | 5.7  | 1  | 1.60 | 19.8  |
| Q9BXB5-2 | Isoform 2 of Oxysterol-binding protein-related protein 10       | 29.8  | 14.9 | 5  | 1.51 | 77.2  |
| O15231-9 | Isoform 9 of Zinc finger protein 185                            | 29.0  | 25.7 | 5  | 2.23 | 34.9  |

|          |                                                                   |      |      |   |      |       |
|----------|-------------------------------------------------------------------|------|------|---|------|-------|
| H0YA55   | Serum albumin (Fragment)                                          | 27.4 | 7.7  | 4 | 1.54 | 51.5  |
| A6NFI3   | Zinc finger protein 316                                           | 27.2 | 2.5  | 2 | 1.57 | 108.4 |
| E9PM62   | Protein wntless homolog (Fragment)                                | 26.3 | 18.5 | 6 | 1.65 | 26.2  |
| A8MY76   | Nucleolar protein 9                                               | 25.9 | 19.6 | 1 | 1.51 | 58.1  |
| Q9Y3Q3   | Transmembrane emp24 domain-containing protein 3                   | 24.8 | 23.0 | 4 | 1.67 | 24.8  |
| Q9UJC5   | SH3 domain-binding glutamic acid-rich-like protein 2              | 24.2 | 30.8 | 3 | 1.63 | 12.3  |
| P80723   | Brain acid soluble protein 1                                      | 24.2 | 52.4 | 6 | 2.42 | 22.7  |
| Q5VZRO   | Golgi-associated plant pathogenesis-related protein 1             | 22.0 | 37.5 | 3 | 1.57 | 14.2  |
| Q9Y605   | MORF4 family-associated protein 1                                 | 20.1 | 37.8 | 3 | 1.76 | 14.6  |
| Q86Y46-2 | Isoform 2 of Keratin, type II cytoskeletal 73                     | 18.3 | 5.5  | 1 | 1.54 | 42.0  |
| P02765   | Alpha-2-HS-glycoprotein                                           | 18.1 | 6.8  | 4 | 1.75 | 39.3  |
| Q9Y385   | Ubiquitin-conjugating enzyme E2 J1                                | 16.9 | 15.7 | 4 | 1.60 | 35.2  |
| P04920-2 | Isoform B1 of Anion exchange protein 2                            | 16.8 | 5.2  | 5 | 1.98 | 135.5 |
| Q9UHF1   | Epidermal growth factor-like protein 7                            | 16.7 | 20.2 | 4 | 1.55 | 29.6  |
| P50150   | Guanine nucleotide-binding protein G(I)/G(S)/G(O) subunit gamma-4 | 14.7 | 32.0 | 2 | 1.53 | 8.4   |
| O75503   | Ceroid-lipofuscinosis neuronal protein 5                          | 14.3 | 5.0  | 2 | 1.79 | 41.5  |
| F5GXP4   | ADP-ribosylation factor-like protein 6-interacting protein 1      | 14.2 | 13.2 | 2 | 1.53 | 20.2  |
| P01034   | Cystatin-C                                                        | 14.2 | 19.2 | 2 | 1.78 | 15.8  |
| Q14999   | Cullin-7                                                          | 14.1 | 1.1  | 2 | 2.30 | 191.0 |
| P09629   | Homeobox protein Hox-B7                                           | 13.7 | 11.5 | 1 | 1.79 | 24.0  |
| Q16626   | Male-enhanced antigen 1                                           | 13.6 | 7.0  | 1 | 2.17 | 19.9  |
| Q2T9J9   | TTC7A protein                                                     | 13.4 | 0.7  | 1 | 2.75 | 98.9  |
| H0YGH6   | Alpha-2-macroglobulin (Fragment)                                  | 13.2 | 13.0 | 2 | 2.57 | 21.9  |
| P20742   | Pregnancy zone protein                                            | 13.1 | 1.4  | 1 | 1.51 | 163.8 |
| Q9Y4H2   | Insulin receptor substrate 2                                      | 12.7 | 2.2  | 3 | 1.68 | 137.2 |
| A6NGB9   | WAS/WASL-interacting protein family member 3                      | 12.0 | 10.6 | 3 | 1.63 | 49.4  |
| Q9HBK9-2 | Isoform 2 of Arsenite methyltransferase                           | 11.9 | 17.2 | 4 | 1.74 | 31.1  |
| B4DL05   | Protein SHQ1 homolog                                              | 11.5 | 4.7  | 3 | 1.72 | 61.5  |
| Q8N0T1   | Uncharacterized protein C8orf59                                   | 9.1  | 32.0 | 4 | 1.71 | 11.4  |
| P39060-2 | Isoform 3 of Collagen alpha-1(XVIII) chain                        | 8.8  | 3.1  | 2 | 1.96 | 135.7 |
| P18065   | Insulin-like growth factor-binding protein 2                      | 7.6  | 7.7  | 2 | 1.86 | 34.8  |
| Q5VUM1   | UPF0369 protein C6orf57                                           | 6.9  | 36.1 | 2 | 1.89 | 12.2  |
| B4DJN5   | Protein kinase C eta type                                         | 6.8  | 6.5  | 1 | 1.67 | 59.5  |
| Q14118   | Dystroglycan                                                      | 6.8  | 1.7  | 1 | 1.55 | 97.4  |
| Q96S97   | Myeloid-associated differentiation marker                         | 6.2  | 1.9  | 1 | 1.53 | 35.3  |
| B4E1B9   | Transmembrane protein 2                                           | 6.0  | 7.5  | 1 | 1.97 | 42.4  |
| Q8WVD3   | E3 ubiquitin-protein ligase RNF138                                | 5.8  | 11.8 | 3 | 1.73 | 28.2  |

|          |                                                       |     |     |   |      |      |
|----------|-------------------------------------------------------|-----|-----|---|------|------|
| Q9NUN5-4 | Isoform 4 of Probable lysosomal cobalamin transporter | 5.5 | 9.6 | 1 | 1.51 | 21.4 |
| P36955   | Pigment epithelium-derived factor                     | 5.4 | 6.5 | 2 | 1.53 | 46.3 |
| P98172   | Ephrin-B1                                             | 5.2 | 5.2 | 1 | 1.51 | 38.0 |
| H0YFA4   | Cysteine-rich protein 2 (Fragment)                    | 5.1 | 8.3 | 1 | 1.77 | 20.7 |

S2 table. The list of 93 down-regulated proteins in 293T SIRT3-OE cells compared to control cells.

| Accession | Description                                                            | Score  | Coverage | Unique Peptides | Ratio (OE/ctrl)_ | MW [kDa] |
|-----------|------------------------------------------------------------------------|--------|----------|-----------------|------------------|----------|
| P06733-2  | Isoform MBP-1 of Alpha-enolase                                         | 3390.6 | 84.5     | 1               | 0.55             | 36.9     |
| Q05639    | Elongation factor 1-alpha 2                                            | 1741.4 | 77.3     | 16              | 0.48             | 50.4     |
| P17066    | Heat shock 70 kDa protein 6                                            | 1122.3 | 24.1     | 1               | 0.60             | 71.0     |
| P00918    | Carbonic anhydrase 2                                                   | 746.3  | 72.3     | 25              | 0.57             | 29.2     |
| P26038    | Moesin                                                                 | 704.6  | 81.8     | 48              | 0.57             | 67.8     |
| F8VZX2    | Poly(rC)-binding protein 2                                             | 613.5  | 80.7     | 1               | 0.61             | 33.8     |
| Q9UHD1    | Cysteine and histidine-rich domain-containing protein 1                | 542.2  | 81.3     | 28              | 0.65             | 37.5     |
| P19367-4  | Isoform 4 of Hexokinase-1                                              | 468.8  | 50.4     | 46              | 0.66             | 101.0    |
| P00505    | Aspartate aminotransferase                                             | 465.9  | 69.3     | 32              | 0.65             | 47.5     |
| P06493    | Cyclin-dependent kinase 1                                              | 379.2  | 69.4     | 18              | 0.66             | 34.1     |
| P30084    | Enoyl-CoA hydratase                                                    | 314.6  | 75.2     | 23              | 0.56             | 31.4     |
| K7ELW5    | Polypyrimidine tract-binding protein 1                                 | 306.8  | 66.1     | 1               | 0.49             | 24.3     |
| Q8IUE6    | Histone H2A type 2-B                                                   | 293.6  | 40.8     | 1               | 0.64             | 14.0     |
| Q7L0Y3    | Mitochondrial ribonuclease P protein 1                                 | 285.0  | 72.2     | 28              | 0.64             | 47.3     |
| P11802    | Cyclin-dependent kinase 4                                              | 275.2  | 64.0     | 16              | 0.56             | 33.7     |
| J3KP15    | Serine/arginine-rich-splicing factor 2 (Fragment)                      | 265.1  | 45.9     | 5               | 0.56             | 15.4     |
| Q9H2U2    | Inorganic pyrophosphatase 2                                            | 252.0  | 69.2     | 24              | 0.62             | 37.9     |
| G5E9W7    | 28S ribosomal protein S22                                              | 239.1  | 51.7     | 15              | 0.65             | 36.8     |
| P30405    | Peptidyl-prolyl cis-trans isomerase F                                  | 223.2  | 79.2     | 16              | 0.54             | 22.0     |
| P21912    | Succinate dehydrogenase [ubiquinone] iron-sulfur subunit               | 209.7  | 59.6     | 17              | 0.58             | 31.6     |
| P49748-2  | Isoform 2 of Very long-chain specific acyl-CoA dehydrogenase           | 194.6  | 47.6     | 25              | 0.63             | 68.0     |
| Q8N684-2  | Isoform 2 of Cleavage and polyadenylation specificity factor subunit 7 | 153.8  | 40.3     | 17              | 0.59             | 51.1     |
| Q9P0M6    | Core histone macro-H2A.2                                               | 140.4  | 52.4     | 14              | 0.60             | 40.0     |
| Q7Z7K6-3  | Isoform 3 of Centromere protein V                                      | 132.4  | 69.5     | 13              | 0.62             | 29.7     |
| Q06265    | Exosome complex component RRP45                                        | 129.4  | 36.7     | 11              | 0.65             | 48.9     |
| P42126    | Enoyl-CoA delta isomerase 1                                            | 121.3  | 38.1     | 9               | 0.53             | 32.8     |
| Q9BYD6    | 39S ribosomal protein L1                                               | 114.6  | 52.6     | 17              | 0.66             | 36.9     |
| Q00059    | Transcription factor A                                                 | 111.3  | 52.0     | 17              | 0.65             | 29.1     |
| Q05193-3  | Isoform 3 of Dynamin-1                                                 | 110.3  | 26.4     | 10              | 0.62             | 96.0     |

|          |                                                                    |       |      |    |      |       |
|----------|--------------------------------------------------------------------|-------|------|----|------|-------|
| P42771   | Cyclin-dependent kinase inhibitor 2A, isoforms 1/2/3               | 109.0 | 60.3 | 7  | 0.50 | 16.5  |
| Q71DI3   | Histone H3.2                                                       | 105.0 | 55.9 | 1  | 0.57 | 15.4  |
| Q14019   | Coactosin-like protein                                             | 102.2 | 90.1 | 5  | 0.65 | 15.9  |
| Q9ULX3   | RNA-binding protein NOB1                                           | 99.5  | 30.1 | 13 | 0.61 | 46.6  |
| Q13257   | Mitotic spindle assembly checkpoint protein MAD2A                  | 91.6  | 35.1 | 8  | 0.62 | 23.5  |
| Q6NUK1-2 | Isoform 2 of Calcium-binding mitochondrial carrier protein SCaMC-1 | 84.9  | 28.0 | 10 | 0.67 | 51.3  |
| Q3SY69   | Mitochondrial 10-formyltetrahydrofolate dehydrogenase              | 78.2  | 18.5 | 14 | 0.58 | 101.7 |
| O15479   | Melanoma-associated antigen B2                                     | 76.4  | 32.9 | 11 | 0.28 | 35.3  |
| Q9UDR5   | Alpha-amino adipic semialdehyde synthase                           | 73.0  | 21.8 | 14 | 0.59 | 102.1 |
| Q9Y305-3 | Isoform 3 of Acyl-coenzyme A thioesterase 9                        | 70.2  | 43.0 | 13 | 0.67 | 43.2  |
| P53007   | Tricarboxylate transport protein                                   | 66.7  | 46.6 | 11 | 0.65 | 34.0  |
| B7Z6B8   | 2,4-dienoyl-CoA reductase                                          | 62.2  | 51.2 | 13 | 0.61 | 35.0  |
| A3KMH1-2 | Isoform 2 of von Willebrand factor A domain-containing protein 8   | 56.0  | 21.0 | 1  | 0.67 | 116.9 |
| Q9NXV6   | CDKN2A-interacting protein                                         | 55.4  | 24.8 | 10 | 0.66 | 61.1  |
| Q9UII2   | ATPase inhibitor                                                   | 55.1  | 43.4 | 7  | 0.58 | 12.2  |
| P35612   | Beta-adducin                                                       | 53.0  | 20.4 | 11 | 0.63 | 80.8  |
| D6RBR7   | Zinc finger protein 330 (Fragment)                                 | 50.6  | 31.4 | 7  | 0.57 | 25.8  |
| D6R9Z7   | Cytochrome c oxidase subunit 7C                                    | 49.6  | 42.9 | 4  | 0.65 | 6.4   |
| Q9UFN0   | Protein NipSnap homolog 3A                                         | 48.7  | 47.8 | 8  | 0.64 | 28.4  |
| P56945-4 | Isoform 4 of Breast cancer anti-estrogen resistance protein 1      | 47.6  | 7.5  | 5  | 0.61 | 77.7  |
| Q9BQ69   | O-acetyl-ADP-ribose deacetylase MACROD1                            | 47.5  | 43.7 | 10 | 0.65 | 35.5  |
| Q5SVL2   | Caspase-7 (Fragment)                                               | 47.3  | 38.3 | 7  | 0.56 | 24.8  |
| P04264   | Keratin, type II cytoskeletal 1                                    | 45.7  | 9.2  | 5  | 0.35 | 66.0  |
| Q9Y692-2 | Isoform 2 of Glucocorticoid modulatory element-binding protein 1   | 42.5  | 13.9 | 5  | 0.65 | 61.3  |
| Q9NX01   | Thioredoxin-like protein 4B                                        | 39.5  | 31.5 | 4  | 0.57 | 17.0  |
| C9JA36   | Sodium/potassium-transporting ATPase subunit beta-3 (Fragment)     | 37.6  | 75.9 | 1  | 0.54 | 15.0  |
| O75616   | GTPase Era                                                         | 35.6  | 28.2 | 10 | 0.62 | 48.3  |
| B7Z5N5   | Mothers against decapentaplegic homolog 2                          | 35.1  | 17.6 | 1  | 0.67 | 48.6  |
| P14406   | Cytochrome c oxidase subunit 7A2                                   | 34.9  | 30.1 | 3  | 0.64 | 9.4   |
| Q14195-2 | Isoform LCRMP-4 of Dihydropyrimidinase-related protein 3           | 34.5  | 15.9 | 4  | 0.45 | 73.9  |
| C9JYQ9   | 60S ribosomal protein L22-like 1                                   | 31.8  | 46.3 | 3  | 0.47 | 14.5  |
| Q14331   | Protein FRG1                                                       | 28.7  | 18.6 | 7  | 0.62 | 29.2  |
| P56181   | NADH dehydrogenase [ubiquinone] flavoprotein 3                     | 28.2  | 26.9 | 1  | 0.59 | 11.9  |
| Q96E29-3 | Isoform 3 of mTERF domain-containing protein 1                     | 27.6  | 18.9 | 5  | 0.63 | 34.3  |
| B9A057   | Cytochrome c oxidase assembly factor                               | 24.7  | 11.0 | 1  | 0.63 | 8.1   |

|          |                                                                       |      |      |   |      |       |
|----------|-----------------------------------------------------------------------|------|------|---|------|-------|
| Q53S33   | BolA-like protein 3                                                   | 24.6 | 41.1 | 6 | 0.56 | 12.1  |
| Q9BQ48   | 39S ribosomal protein L34                                             | 24.3 | 10.9 | 1 | 0.62 | 10.2  |
| Q9H008   | Phospholysine phosphohistidine inorganic pyrophosphate phosphatase    | 23.6 | 17.4 | 4 | 0.61 | 29.1  |
| P31327-2 | Isoform 2 of Carbamoyl-phosphate synthase [ammonia]                   | 22.8 | 5.6  | 2 | 0.52 | 116.0 |
| P32321   | Deoxycytidylate deaminase                                             | 21.4 | 18.5 | 2 | 0.55 | 20.0  |
| Q16773-2 | Isoform 2 of Kynurenine--oxoglutarate transaminase 1                  | 20.4 | 7.8  | 2 | 0.64 | 42.5  |
| Q9NPG3-2 | Isoform 2 of Ubiquitin-1                                              | 19.8 | 5.4  | 4 | 0.64 | 118.5 |
| Q96A00   | Protein phosphatase 1 regulatory subunit 14A                          | 18.7 | 23.8 | 4 | 0.53 | 16.7  |
| Q8IWL3   | Iron-sulfur cluster co-chaperone protein HscB                         | 18.2 | 26.4 | 5 | 0.60 | 27.4  |
| F5H7F6   | Microsomal glutathione S-transferase 1 (Fragment)                     | 16.4 | 50.7 | 5 | 0.48 | 8.9   |
| I3L0Y6   | NmrA-like family domain-containing protein 1 (Fragment)               | 16.4 | 17.6 | 3 | 0.42 | 20.8  |
| P78549-3 | Isoform 3 of Endonuclease III-like protein 1                          | 16.2 | 8.8  | 2 | 0.62 | 32.8  |
| P56377   | AP-1 complex subunit sigma-2                                          | 16.1 | 22.9 | 3 | 0.64 | 18.6  |
| P0CG34   | Thymosin beta-15A                                                     | 15.7 | 55.6 | 4 | 0.56 | 5.2   |
| K7ESB0   | Centromere protein S (Fragment)                                       | 14.7 | 30.3 | 2 | 0.45 | 8.9   |
| H3BU49   | ADP-ribosylation factor-like protein 2-binding protein                | 10.8 | 22.0 | 2 | 0.67 | 13.8  |
| O60662   | Kelch-like protein 41                                                 | 10.4 | 10.1 | 2 | 0.57 | 68.0  |
| F5GZY7   | Gamma-aminobutyric acid receptor-associated protein-like 1 (Fragment) | 10.0 | 34.3 | 1 | 0.64 | 8.6   |
| P13284   | Gamma-interferon-inducible lysosomal thiol reductase                  | 9.9  | 20.0 | 2 | 0.54 | 27.9  |
| G3XAJ6   | Raft-linking protein, isoform CRA_c                                   | 9.4  | 5.0  | 2 | 0.67 | 58.7  |
| Q9HC07   | Transmembrane protein 165                                             | 8.4  | 10.2 | 2 | 0.63 | 34.9  |
| J3QR01   | Centromere protein X (Fragment)                                       | 8.3  | 41.3 | 2 | 0.55 | 8.3   |
| Q9H477-2 | Isoform 2 of Ribokinase                                               | 7.5  | 7.0  | 2 | 0.62 | 30.3  |
| P12074   | Cytochrome c oxidase subunit 6A1                                      | 7.1  | 26.6 | 1 | 0.57 | 12.1  |
| Q9BQE5   | Apolipoprotein L2                                                     | 6.9  | 8.6  | 3 | 0.37 | 37.1  |
| Q02487-2 | Isoform 2B of Desmocollin-2                                           | 6.8  | 2.0  | 2 | 0.65 | 93.7  |
| Q9Y619   | Mitochondrial ornithine transporter 1                                 | 6.6  | 6.6  | 2 | 0.67 | 32.7  |
| K7EIN2   | Protein syndesmos (Fragment)                                          | 6.0  | 26.8 | 4 | 0.66 | 21.9  |
| O95359-2 | Isoform 2 of Transforming acidic coiled-coil-containing protein 2     | 5.6  | 2.6  | 1 | 0.67 | 64.1  |
| J3KT99   | 39S ribosomal protein L45                                             | 5.4  | 45.7 | 1 | 0.58 | 4.2   |

S3 table. Primers used in this work

| Primer name | Primer sequence         |
|-------------|-------------------------|
| CDK4-F      | ATGGCTACCTCTCGATATGAGC  |
| CDK4-R      | CATTGGGGACTCTCACACTCT   |
| CDK1-F      | AAACTACAGGTCAAGTGGTAGCC |
| CDK1-R      | TCCTGCATAAGCACATCCTGA   |
| SDHB-F      | ACAGCTCCCCGTATCAAGAAA   |
| SDHB-R      | GCATGATCTTCGGAAGGTCAA   |
| COA7-F      | CTGCCAAGGTGTTGAAGTTTAAC |
| COA7-R      | AGGCTTCTCACACGCCATC     |
| MRPL17-F    | CCGCGTATTTCCGCCGTATG    |
| MRPL17-R    | CATGGTGCCTCGATGCGTT     |
| MRPS9-F     | CAGTTCATTCGGCTGCTAGAA   |
| MRPS9-R     | AGGCCATTCCTTGCTCATCAT   |
| MRPS6-F     | GGCCAGAGACTGCTGCTAC     |
| MRPS6-R     | GCGGTGGGTGCATAAAAATCC   |
| MRPL49-F    | GCTACCATGTTCCGGGCTAC    |
| MRPL49-R    | CAGGCGCTCCACAACTGATA    |
| MRPS21-F    | ACAGAATCCTCACTATGGATGGG |
| MRPS21-R    | AAGAAGTTGATCTTGCGAGCC   |
| MRPL1-F     | GGAAGGCGAACCTGAGGATG    |
| MRPL1-R     | TGCCATATCCAGTGTCAAATCAA |
| MRPS22-F    | ACCGCTACCTTGCTCTTTTCG   |
| MRPS22-R    | TGGCTTCAGTTCTTGTATAGCTG |
| MRPL45-F    | TCCAGAAAAATCGGACCGTTC   |
| MRPL45-R    | GTTCTCTCTATCAGTCCCTCCTT |
| MRPL34-F    | TGCCCCGCGGATATAGACT     |
| MRPL34-R    | GATCCAGCCAAGACAGCCATA   |
| SIRT3-F     | CCCCAAGCCCTTTTTCACTTT   |
| SIRT3-R     | CGACACTCTCTCAAGCCCA     |
